# Supplementary material for: The Impact of Avoidable Mortality Changes on Life Expectancy at Birth in Korea, 2000-2020
Source: Preprints.org preprint supplement (doi:10.20944/preprints202308.2020.v1), 2023-08-30
Supplement: Supplementary file 1 [file supplementary]

**Table S1.** Joint OECD/Eurostat lists of preventable and treatable causes of mortality

| Category | Causes of deaths | | ICD-10 Code | Preventable mortality | Treatable mortality |
| --- | --- | --- | --- | --- | --- |
| Infectious diseases ((A00-B99) | Intestinal diseases | | A00-A09 | X |  |
| Diphtheria, Tetanus, Poliomyelitis | | A35, A36, A80 | X |  |
| Whooping cough | | A37 | X |  |
| Meningococcal infection | | A39 | X |  |
| Sepsis due to streptococcus pneumonia and sepsis due to hemophilus influenzae | | A40.3, , A41.3 | X |  |
| Haemophilus inflenza infections | | A49.2 | X |  |
| Sexually transmitted infections (except HIV/AIDS) | | A50-A60, A63, A64 | X |  |
| Varicella | | B01 | X |  |
| Measles | | B05 | X |  |
| Rubella | | B06 | X |  |
| Viral Hepatitis | | B15-B19 | X |  |
| HIV/AIDS | | B20-B24 | X |  |
| Malaria | | B50-B54 | X |  |
| Haemophilus and pneumococcal meningitis | | G00.0, G00.1 | X |  |
| Tuberculosis | | A15-A19, B90, J65 | X (50%) | X (50%) |
| Scarlet fever | | A38 |  | X |
| Sepsis | | A40(excl.A40.3), |  | X |
| A41(excl.A41.3) |
| Cellulitis | | A46, L03 |  | X |
| Legionnaires disease | | A48.1 |  | X |
| Streptococcal and enterococci infection | | A49.1 |  | X |
| Other meningitis | | G00.2, G00.3, G00.8 G00.9 |  | X |
| Meningitis due to other and unspecified causes | | G03 |  | X |
| Cancer (C00-D48) | Lip, oral cavity and pharynx | | C00-C14 | X |  |
| Oesophageal cancer | | C15 | X |  |
| Stomach cancer | | C16 | X |  |
| Liver cancer | | C22 | X |  |
| Lung cancer | | C33-C34 | X |  |
| Mesothelioma | | C45 | X |  |
| Skin (melanoma) cancer | | C43 | X |  |
| Bladder cancer | | C67 | X |  |
| Cervical cancer | | C53 | X (50%) | X (50%) |
| Colorectal cancer | | C18-C21 |  | X |
| Breast cancer (female only) | | C50 |  | X |
| Uterus cancer | | C54,C55 |  | X |
| Testicular cancer | | C62 |  | X |
| Thyroid cancer | | C73 |  | X |
| Hodgkin's disease | | C81 |  | X |
| Lymphoid leukaemia | | C91.0, C91.1 |  | X |
| Benign neoplasm | | D10-D36 |  | X |
| Endocrine and metabolic diseases (E00-E88) | Nutritional deficiency anaemia | | D50-D53 | X |  |
| Diabetes mellitus | | E10-E14 | X (50%) | X (50%) |
| Thyroid disorders | | E00-E07 |  | X |
| Adrenal disorders | | E24-E25 |  | X |
| (except E24.4),E27 |
| Diseases of the nervous system (G00-G98) | Epilepsy | | G40,G41 |  | X |
|  |
| Diseases of the circulatory system (I00-I99) | Aortic aneurysm | | I71 | * (50%) | * (50%) |  |
| Hypertensive diseases | | I10-I13, I15 | * (50%) | * (50%) |  |
| Ischaemic heart diseases | | I20-I25 | * (50%) | * (50%) |  |
| Cerebrovascular diseases | | I60-I69 | * (50%) | * (50%) |  |
| Other atherosclerosis | | I70, I73.9 | * (50%) | * (50%) |  |
| Rheumatic and other heart disease | | I00-I09 |  | X |  |
| Venous thromboembolism | | I26, I80, I82.9 |  | X * |  |
| Diseases of the respiratory system (J00-J98) | Influenza | | J09-J11 | X |  |  |
| Pneumonia due to Streptococcus pneumonia or Hemophilus vaccination. | | J13-J14 | X |  |  |
| Chronic lower respiratory diseases | | J40-J44 | X |  |  |
| Lung diseases due to external agents | | J60-J64,J66-J70,J82,J92 | X |  |  |
| Upper respiratory infections | | J00-J06, J30-J39 |  | X |  |
| Pneumonia, not elsewhere classified or organism unspecified | | J12, J15, J16- J18 |  | X |  |
| Acute lower respiratory infections | | J20-J22 |  | X |  |
| Asthma and bronchiectasis | | J45-J47 |  | X |  |
| Adult respiratory distress syndrome | | J80 |  | X |  |
| Pulmonary oedema | | J81 |  | X |  |
| Abscess of lung and mediastinum pyothorax | | J85, J86 |  | X |  |
| Other pleural disorders | | J90, J93, J94 |  | X |  |
| Diseases of the digestive system (K00-K92) | Gastric and duodenal ulcer | | K25-K28 |  | X |  |
| Appendicitis | | K35-K38 |  | X |  |
| Abdominal hernia | | K40-K46 |  | X |  |
| Cholelithiasis and cholecystitis | | K80-K81 |  | X |  |
| Other diseases of gallbladder or iliary tract | | K82-K83 |  | X |  |
| Acute pancreatitis | | K85.0,1,3,8,9 |  | X |  |
| Other diseases of pancreas | | K86.1,2,3,8,9 |  | X |  |
| Diseases of the genitourinary system (N00-N98) | Nephritis and nephrosis | | N00-N07 |  | X |  |
| Obstructive uropathy | | N13,N20-N21, N35 |  | X |  |
| Renal failure | | N17-N19 |  | X |  |
| Renal colic | | N23 |  | X |  |
| Disorders resulting from renal tubular dysfunction | | N25 |  | X |  |
| Unspecified contracted kidney, small kidney of unknown cause | | N26-N27 |  | X |  |
| Inflammatory diseases of genitourinary system | | N34.1,N70-N73,N75.0, |  | X |  |
| N75.1,N76.4,6 |  |
| Prostatic hyperplasia | | N40 |  | X |  |
| Pregnancy, childbirth and perinatal period (O00-O99, P00-P96) | Tetanus neonatorum | | A33 | X |  |  |
| Obstetrical tetanus | | A34 | X |  |  |
| Pregnancy, childbirth and the puerperium | | O00-O99 |  | X |  |
| Certain conditions originating in the perinatal period | | P00-P96 |  | X |  |
| Congenital malformations (Q00-Q99) | Certain congenital malformations (neural tube defects) | | Q00, Q01, Q05 | X |  |  |
| Congenital malformations of the circulatory system (heart defects) | | Q20-Q28 |  | X |  |
| Adverse effects of medical and surgical care | Drugs, medicaments and biological substances causing adverse effects in therapeutic use | | Y40-Y59 |  | X * |  |
| Misadventures to patients during surgical and medical care | | Y60-Y69,Y83-Y84 |  | X * |  |
| Medical devices associated with adverse incidents in diagnostic and therapeutic use | | Y70–Y82 |  | X * |  |
| Injuries (V01-Y89) | Transport Accidents | | V01-V99 | X |  |  |
| Accidental Injuries | | W00-X39, X46-X59 | X |  |  |
| Intentional self-harm | | X66-X84 | X |  |  |
| Event of undetermined intent | | Y16-Y34 | X |  |  |
| Assault | | X86-Y09 | X |  |  |
| Alchol related and drug related deaths | Alcohol-related deaths | Alcohol- specific disorders and poisonings | E24.4, F10, G31.2, G62.1, G72.1, I42.6, K29.2, K70, K85.2, K86.0, Q86.0, R78.0,X45, X65, Y15 | X |  |  |
| Other alcohol-related disorders | K73, K74.0-K74.2, K74.6 | X |  |  |
| Drug-related deaths1 | Drug disorders and poisonings | F11-F16,F18-F19, X40-X44, X85, Y10-Y14 | X |  |  |
| Intentional self-poisoning by drugs | X60-X64 | X |  |  |

1 Some of these conditions that are mainly acquired when people are hospitalized or in contact with health services might also be considered to be preventable, in the sense that the incidence of these health care-associated infections or health problems might be reduced through greater prevention in health care facilities.

2 Drug-related deaths include both illegal and legal drugs.

**Table S2.** Life expectancy at birth by gender in Korea, 1970-2020

| Year | Life expectancy | | | Difference1 |
| --- | --- | --- | --- | --- |
| Total | Male | Female |
| 1970 | 62.273 | 58.742 | 65.810 | 7.068 |
| 1971 | 62.692 | 59.070 | 66.321 | 7.251 |
| 1972 | 63.099 | 59.389 | 66.815 | 7.426 |
| 1973 | 63.494 | 59.700 | 67.292 | 7.592 |
| 1974 | 63.877 | 60.004 | 67.754 | 7.750 |
| 1975 | 64.248 | 60.300 | 68.201 | 7.901 |
| 1976 | 64.609 | 60.589 | 68.634 | 8.044 |
| 1977 | 64.960 | 60.871 | 69.053 | 8.182 |
| 1978 | 65.301 | 61.147 | 69.459 | 8.313 |
| 1979 | 65.632 | 61.415 | 69.853 | 8.438 |
| 1980 | 66.147 | 61.888 | 70.410 | 8.522 |
| 1981 | 66.664 | 62.389 | 70.942 | 8.554 |
| 1982 | 67.167 | 62.885 | 71.452 | 8.567 |
| 1983 | 67.654 | 63.370 | 71.940 | 8.570 |
| 1984 | 68.301 | 63.996 | 72.609 | 8.613 |
| 1985 | 68.910 | 64.597 | 73.228 | 8.630 |
| 1986 | 69.533 | 65.266 | 73.805 | 8.538 |
| 1987 | 70.127 | 65.911 | 74.348 | 8.437 |
| 1988 | 70.650 | 66.462 | 74.844 | 8.382 |
| 1989 | 71.156 | 67.003 | 75.314 | 8.311 |
| 1990 | 71.659 | 67.461 | 75.865 | 8.404 |
| 1991 | 72.154 | 67.906 | 76.411 | 8.505 |
| 1992 | 72.605 | 68.403 | 76.815 | 8.412 |
| 1993 | 73.101 | 68.876 | 77.334 | 8.458 |
| 1994 | 73.474 | 69.292 | 77.661 | 8.370 |
| 1995 | 73.814 | 69.698 | 77.935 | 8.237 |
| 1996 | 74.239 | 70.211 | 78.269 | 8.058 |
| 1997 | 74.685 | 70.710 | 78.660 | 7.950 |
| 1998 | 75.120 | 71.246 | 78.995 | 7.749 |
| 1999 | 75.495 | 71.756 | 79.233 | 7.477 |
| 2000 | 76.007 | 72.347 | 79.668 | 7.321 |
| 2001 | 76.497 | 72.914 | 80.081 | 7.167 |
| 2002 | 76.827 | 73.365 | 80.291 | 6.925 |
| 2003 | 77.267 | 73.787 | 80.751 | 6.965 |
| 2004 | 77.765 | 74.298 | 81.234 | 6.936 |
| 2005 | 78.243 | 74.886 | 81.601 | 6.715 |
| 2006 | 78.778 | 75.439 | 82.119 | 6.680 |
| 2007 | 79.156 | 75.861 | 82.451 | 6.590 |
| 2008 | 79.604 | 76.246 | 82.962 | 6.716 |
| 2009 | 80.038 | 76.685 | 83.392 | 6.707 |
| 2010 | 80.237 | 76.841 | 83.635 | 6.794 |
| 2011 | 80.617 | 77.262 | 83.974 | 6.711 |
| 2012 | 80.868 | 77.568 | 84.170 | 6.602 |
| 2013 | 81.361 | 78.124 | 84.599 | 6.475 |
| 2014 | 81.798 | 78.578 | 85.018 | 6.440 |
| 2015 | 82.063 | 78.961 | 85.167 | 6.206 |
| 2016 | 82.356 | 79.305 | 85.409 | 6.104 |
| 2017 | 82.688 | 79.670 | 85.708 | 6.038 |
| 2018 | 82.735 | 79.737 | 85.735 | 5.998 |
| 2019 | 83.286 | 80.273 | 86.301 | 6.028 |
| 2020 | 83.481 | 80.489 | 86.474 | 5.985 |

1Difference; the difference in life expectancy between males and females

Note: Annual Life table 1970~2020 can be found the following link: https://kosis.kr/statHtml/statHtml.do?orgId=101&tblId=DT_1B42&vw_cd=MT_ETITLE&list_id=F_29&scrId=&language=en&seqNo=&lang_mode=en&obj_var_id=&itm_id=&conn_path=MT_ETITLE&path=%252Feng%252FstatisticsList%252FstatisticsListIndex.do

| **Age**  **Group** | **Male** | | | | | | **Female** | | | | | | | |
| --- | --- | --- | --- | --- | --- | --- | --- | --- | --- | --- | --- | --- | --- | --- |
| **2000-2020** | | **2000-2010** | | **2010-2020** | | **2000-2020** | | **2000-2010** | | **2010-2020** | | |
| **Years**1 | **Rate(%)**2 | **Years**1 | **Rate(%)**2 | **Years**1 | **Rate(%)**2 | **Years**1 | **Rate(%)**2 | **Years**1 | **Rate(%)**2 | **Years**1 | **Rate(%)**2 |
| 0 | 0.240 | 2.95 | 0.162 | 3.60 | 0.078 | 2.14 | 0.284 | 4.17 | 0.229 | 5.77 | 0.055 | 1.94 |
| 1-4 | 0.101 | 1.24 | 0.075 | 1.67 | 0.026 | 0.71 | 0.090 | 1.32 | 0.063 | 1.59 | 0.027 | 0.95 |
| 5-9 | 0.076 | 0.93 | 0.055 | 1.22 | 0.021 | 0.58 | 0.058 | 0.85 | 0.048 | 1.21 | 0.010 | 0.35 |
| 10-14 | 0.043 | 0.53 | 0.029 | 0.65 | 0.014 | 0.38 | 0.036 | 0.53 | 0.024 | 0.60 | 0.012 | 0.42 |
| 15-19 | 0.102 | 1.25 | 0.067 | 1.49 | 0.035 | 0.96 | 0.050 | 0.73 | 0.038 | 0.96 | 0.012 | 0.42 |
| 20-24 | 0.127 | 1.56 | 0.072 | 1.60 | 0.055 | 1.51 | 0.029 | 0.43 | 0.013 | 0.33 | 0.016 | 0.56 |
| 25-29 | 0.115 | 1.41 | 0.060 | 1.34 | 0.055 | 1.51 | 0.027 | 0.40 | -0.006 | -0.15 | 0.033 | 1.16 |
| 30-34 | 0.148 | 1.82 | 0.094 | 2.09 | 0.054 | 1.48 | 0.048 | 0.71 | 0.017 | 0.43 | 0.031 | 1.09 |
| 35-39 | 0.238 | 2.92 | 0.170 | 3.78 | 0.068 | 1.86 | 0.058 | 0.85 | 0.032 | 0.81 | 0.026 | 0.92 |
| 40-44 | 0.384 | 4.72 | 0.226 | 5.03 | 0.158 | 4.33 | 0.098 | 1.44 | 0.062 | 1.56 | 0.036 | 1.27 |
| 45-49 | 0.508 | 6.24 | 0.298 | 6.63 | 0.210 | 5.76 | 0.131 | 1.92 | 0.079 | 1.99 | 0.052 | 1.83 |
| 50-54 | 0.576 | 7.07 | 0.326 | 7.25 | 0.250 | 6.85 | 0.211 | 3.10 | 0.137 | 3.45 | 0.074 | 2.61 |
| 55-59 | 0.700 | 8.60 | 0.416 | 9.26 | 0.284 | 7.79 | 0.306 | 4.50 | 0.218 | 5.50 | 0.088 | 3.10 |
| 60-64 | 0.883 | 10.85 | 0.564 | 12.55 | 0.319 | 8.74 | 0.465 | 6.83 | 0.306 | 7.71 | 0.159 | 5.60 |
| 65-69 | 0.996 | 12.23 | 0.590 | 13.13 | 0.406 | 11.13 | 0.718 | 10.55 | 0.45 | 11.34 | 0.268 | 9.44 |
| 70-74 | 1.105 | 13.57 | 0.533 | 11.86 | 0.572 | 15.68 | 1.032 | 15.16 | 0.615 | 15.50 | 0.417 | 14.69 |
| 75-79 | 0.928 | 11.40 | 0.412 | 9.17 | 0.516 | 14.14 | 1.189 | 17.47 | 0.659 | 16.61 | 0.53 | 18.67 |
| 80-84 | 0.565 | 6.94 | 0.227 | 5.05 | 0.338 | 9.27 | 1.049 | 15.41 | 0.534 | 13.46 | 0.515 | 18.14 |
| 85+ | 0.304 | 3.73 | 0.117 | 2.60 | 0.187 | 5.13 | 0.927 | 13.62 | 0.448 | 11.29 | 0.479 | 16.87 |
| All | 8.142 | 100.00 | 4.494 | 100.00 | 3.648 | 100.00 | 6.806 | 100.00 | 3.967 | 100.00 | 2.839 | 100.00 |

**Table S3.** Age group-specific contribution to life expectancy at birth in Korea, 2000-2020.

1 Years: Years contributed by each age group to the increase in LEB.

2 Rate(%): Rate contributed by each age group to the increase in LEB.

**Table S4.** Contribution of the mortality gender gap at each age group to the total gender gap in life expectancy at birth in Korea, 2000, 2010 and 2020.

| **Age** | **2000** | | **2010** | | **2020** | |
| --- | --- | --- | --- | --- | --- | --- |
| **Group** | **Years**1 | **Rate(%)**2 | **Years**1 | **Rate(%)**2 | **Years**1 | **Rate(%)**2 |
| 0 | 0.025 | 0.34 | 0.079 | 1.16 | 0.052 | 0.87 |
| 1-4 | 0.028 | 0.38 | 0.01 | 0.15 | 0.009 | 0.15 |
| 5-9 | 0.029 | 0.40 | 0.018 | 0.26 | 0.006 | 0.10 |
| 10-14 | 0.02 | 0.27 | 0.014 | 0.21 | 0.011 | 0.18 |
| 15-19 | 0.091 | 1.24 | 0.06 | 0.88 | 0.036 | 0.60 |
| 20-24 | 0.127 | 1.73 | 0.07 | 1.03 | 0.029 | 0.48 |
| 25-29 | 0.142 | 1.94 | 0.078 | 1.15 | 0.055 | 0.92 |
| 30-34 | 0.172 | 2.35 | 0.094 | 1.38 | 0.069 | 1.15 |
| 35-39 | 0.272 | 3.71 | 0.13 | 1.91 | 0.087 | 1.45 |
| 40-44 | 0.42 | 5.74 | 0.259 | 3.81 | 0.131 | 2.19 |
| 45-49 | 0.594 | 8.11 | 0.386 | 5.68 | 0.224 | 3.74 |
| 50-54 | 0.693 | 9.46 | 0.529 | 7.79 | 0.355 | 5.93 |
| 55-59 | 0.833 | 11.38 | 0.668 | 9.83 | 0.487 | 8.14 |
| 60-64 | 0.959 | 13.10 | 0.726 | 10.69 | 0.586 | 9.79 |
| 65-69 | 0.947 | 12.93 | 0.828 | 12.19 | 0.707 | 11.81 |
| 70-74 | 0.851 | 11.62 | 0.952 | 14.01 | 0.784 | 13.10 |
| 75-79 | 0.624 | 8.52 | 0.862 | 12.69 | 0.862 | 14.40 |
| 80-84 | 0.333 | 4.55 | 0.605 | 8.90 | 0.771 | 12.88 |
| 85+ | 0.162 | 2.21 | 0.426 | 6.27 | 0.725 | 12.11 |
| All | 7.322 | 100 | 6.794 | 100 | 5.986 | 100 |

1 Years: Years contributed by the mortality gender gap at each group to the total gender gap in LEB.

2 Rate(%): Rate contributed by the mortality gender gap at each group to the total gender gap in LEB.

**Table S5.** Arriaga decomposition of changes in life expectancy at birth by avoidable cause of death, 2000-2010

*In a separate Excel File (Table S5.xlsx)

**Table S6.** Contribution of preventable and treatable causes to life expectancy, 2000-2010

| Age group | Male | | | Female | | |
| --- | --- | --- | --- | --- | --- | --- |
| Avoidable cause 1 (years) | Preventable cause  (years) | Treatable cause  (years) | Avoidable cause 1  (years) | Preventable cause  (years) | Treatable cause  (years) |
| 0 | 0.08 | 0.0055 | 0.0745 | 0.096 | 0.015 | 0.081 |
| 1-4 | 0.06 | 0.0505 | 0.0095 | 0.044 | 0.0345 | 0.0095 |
| 5-9 | 0.044 | 0.0405 | 0.0035 | 0.033 | 0.0275 | 0.0055 |
| 10-14 | 0.019 | 0.0155 | 0.0035 | 0.015 | 0.0115 | 0.0035 |
| 15-19 | 0.063 | 0.0585 | 0.0045 | 0.025 | 0.0225 | 0.0025 |
| 20-24 | 0.062 | 0.058 | 0.004 | -0.002 | -0.001 | -0.001 |
| 25-29 | 0.049 | 0.042 | 0.007 | -0.009 | -0.012 | 0.003 |
| 30-34 | 0.074 | 0.0595 | 0.0145 | 0.006 | 0.001 | 0.005 |
| 35-39 | 0.141 | 0.1155 | 0.0255 | 0.022 | 0.015 | 0.007 |
| 40-44 | 0.182 | 0.1445 | 0.0375 | 0.043 | 0.028 | 0.015 |
| 45-49 | 0.263 | 0.21 | 0.053 | 0.064 | 0.04 | 0.024 |
| 50-54 | 0.299 | 0.2395 | 0.0595 | 0.112 | 0.074 | 0.038 |
| 55-59 | 0.376 | 0.2865 | 0.0895 | 0.176 | 0.112 | 0.064 |
| 60-64 | 0.486 | 0.35 | 0.136 | 0.254 | 0.156 | 0.098 |
| 65-69 | 0.508 | 0.336 | 0.172 | 0.365 | 0.207 | 0.158 |
| 70-74 | 0.412 | 0.25 | 0.162 | 0.458 | 0.248 | 0.21 |
| All ages | 3.118 | 2.262 | 0.856 | 1.702 | 0.979 | 0.723 |

1 Avoidable cause: sum of years of contributions by preventable cause and treatable cause

**Table S7.** Contribution life expectancy at birth by avoidable cause group, 2000-2010

| Disease category | Males | Female |
| --- | --- | --- |
| IFD | 0.15 | 0.039 |
| CA | 0.733 | 0.292 |
| EMD | 0.195 | 0.196 |
| DNS | 0.008 | 0.006 |
| DCS | 0.863 | 0.776 |
| DRS | 0.185 | 0.09 |
| DDS | 0.501 | 0.108 |
| DGU | 0.016 | 0.016 |
| PPN | 0.012 | 0.045 |
| CM | 0.057 | 0.033 |
| INJ | 0.398 | 0.101 |
| Total | 3.118 | 1.702 |

IFD : Infectious disease, CA : Cancer, EMD : Endocrine and metabolic disease

DNS : Disease of nervous system, DCS : Disease of circulatory system

DRS : Disease of respiratory system, DDS : Disease of digestive system

DGU : Disease of genitourinary system, PPN : Pregnancy, childbirth and perinatal period

CM : Congenital malformation, INJ : Injuries

**Table S8.** Arriaga decomposition of changes in life expectancy at birth by avoidable cause of death, 2000-2010

*In a separate Excel File (Table S8.xlsx)

**Table S9.** Contribution of preventable and treatable causes to life expectancy, 2010-2020

| Age group | Male | | | Female | | |
| --- | --- | --- | --- | --- | --- | --- |
| Avoidable cause 1 (years) | Preventable cause  (years) | Treatable cause  (years) | Avoidable cause 1  (years) | Preventable cause  (years) | Treatable cause  (years) |
| 0 | 0.069 | 0.002 | 0.067 | 0.042 | 0.0015 | 0.0405 |
| 1-4 | 0.02 | 0.013 | 0.007 | 0.021 | 0.0115 | 0.0095 |
| 5-9 | 0.011 | 0.009 | 0.002 | 0.006 | 0.0045 | 0.0015 |
| 10-14 | 0.008 | 0.007 | 0.001 | 0.008 | 0.007 | 0.001 |
| 15-19 | 0.02 | 0.0185 | 0.0015 | 0.003 | 0.002 | 0.001 |
| 20-24 | 0.047 | 0.042 | 0.005 | 0.012 | 0.0075 | 0.0045 |
| 25-29 | 0.043 | 0.044 | -0.001 | 0.031 | 0.029 | 0.002 |
| 30-34 | 0.047 | 0.0435 | 0.0035 | 0.029 | 0.026 | 0.003 |
| 35-39 | 0.053 | 0.0485 | 0.0045 | 0.026 | 0.025 | 0.001 |
| 40-44 | 0.118 | 0.1045 | 0.0135 | 0.036 | 0.0325 | 0.0035 |
| 45-49 | 0.169 | 0.1515 | 0.0175 | 0.053 | 0.046 | 0.007 |
| 50-54 | 0.211 | 0.18 | 0.031 | 0.066 | 0.054 | 0.012 |
| 55-59 | 0.252 | 0.2185 | 0.0335 | 0.085 | 0.0675 | 0.0175 |
| 60-64 | 0.304 | 0.2525 | 0.0515 | 0.141 | 0.096 | 0.045 |
| 65-69 | 0.359 | 0.29 | 0.069 | 0.227 | 0.151 | 0.076 |
| 70-74 | 0.489 | 0.371 | 0.118 | 0.345 | 0.2215 | 0.1235 |
| All ages | 2.22 | 1.7955 | 0.4245 | 1.131 | 0.7825 | 0.3485 |

1 Avoidable cause: sum of years of contributions by preventable cause and treatable cause

**Table S10.** Contribution life expectancy at birth by avoidable cause group, 2010-2020

| Disease category | Males | Female |
| --- | --- | --- |
| IFD | 0.08 | 0.037 |
| CA | 0.782 | 0.285 |
| EMD | 0.144 | 0.109 |
| DNS | 0.006 | 0.006 |
| DCS | 0.388 | 0.316 |
| DRS | 0.023 | 0.011 |
| DDS | 0.067 | 0.024 |
| DGU | 0.022 | 0.029 |
| PPN | 0.058 | 0.037 |
| CM | 0.016 | 0.012 |
| INJ | 0.634 | 0.265 |
| Total | 2.22 | 1.131 |

IFD : Infectious disease, CA : Cancer, EMD : Endocrine and metabolic disease

DNS : Disease of nervous system, DCS : Disease of circulatory system

DRS : Disease of respiratory system, DDS : Disease of digestive system

DGU : Disease of genitourinary system, PPN : Pregnancy, childbirth and perinatal period

CM : Congenital malformation, INJ : Injuries
